# Supplementary material
Source: publisher figshare collection journal article supplement (https://gsapubs.figshare.com/ndownloader/files/22410069)
Supplement: Supplementary file 1 [file 22410069]

## Sheet: Sheet2
Table A - Paleocurrent data collected along the Magdalena, Xiotillo, and Piedra Hueca Creeks. Data have been corrected for bedding dip using the
stereographic projection and are presented according to their stratigraphic position along the measured columns.
		Column A (Magdalena Creek)
Station	Unit	Distance from the column base	Litofacies	Paleocurrent direction (azimuthal)
1	Piedra Hueca Formation	26-27 m	Gt	N 092°
				N 073°
				N 072°
				N 060°
				N 055°
				N 050°
				N 045°
				N 022°
				N 005°
				N 353°
2	Piedra Hueca Formation	34-35 m	Gt	N 054°
				N 037°
				N 032°
				N 027°
				N 006°
				N 348°
				N 302°
				N 300°
				N 300°
				N 269°
				N 267°
				N 264°
3	Otlaltepec Formation	50-51 m	Gt	N 324°
				N 307°
				N 283°
				N 281°
				N 274°
4	Otlaltepec Formation	54.5 m	Gt	N 292°
				N 285°
				N 272°
				N 269°
				N 268°
				N 263°
				N 259°
5	Otlaltepec Formation	59 m	Gt	N 054°
				N 037°
				N 302°
				N 305°
				N 307°
		Column B (Xiotillo Creek)
Station	Unit	Distance from the column base	Litofacies	Paleocurrent direction (azimuthal)
1	Piedra Hueca Formation	31 m	St	N 326°
				N 355°
				N 010°
				N 033°
				N 034°
2	Piedra Hueca Formation	40-41 m	St	N 286°
				N 297°
				N 323°
				N 357°
				N 012°
				N 049°
3	Piedra Hueca Formation	51.5-52.5 m	St	N332°
				N 047°
				N 051°
				N 057°
4	Otlaltepec Formation	107 m	Gt	N 031°
				N 030°
				N 024°
				N 021°
				N 018°
5	Otlaltepec Formation	111 m	Gt	N 045°
				N 037°
				N 032°
				N 031°
6	Otlaltepec Formation	122-124 m	Gt	N 049°
				N 028°
				N 014°
				N 011°
				N 336°
				N 328°
				N 298°
7	Otlaltepec Formation	127-128 m	Gt	N 021°
				N 008°
				N 000°
				N 356°
				N 351°
		Column C (Piedra Hueca Creek)
Station	Unit	Distance from the column base	Litofacies	Paleocurrent direction (azimuthal)
1	Piedra Hueca Formation	5 m	St	N 260°
				N 263°
				N 264°
				N 264°
				N 268°
				N 271°
				N 274°
				N 283°
				N 293°
				N 311°
2	Piedra Hueca Formation	22-24 m	St	N 072°
				N 070°
				N 033°
				N 024°
				N 013°
				N 355°
				N 347°
				N 341°
				N 323°
				N 359°
				N 260°
3	Piedra Hueca Formation	148 m	St	N 266°
				N 298°
				N 298°
				N 300°
				N 327°
				N 340°
				N 340°
				N 345°
				N 348°
				N 351°
				N 257°
4	Piedra Hueca Formation	178.5 m	St	N 288°
				N 246°
				N 238°
				N 229°
				N 223°
				N 220°
				N 212°
				N 205°
				N 228°
				N 089°
5	Piedra Hueca Formation	259-260 m	St	N 026°
				N 001°
				N 338°
				N 324°
				N 324°
				N 315°
				N 302°
				N 298°
				N 295°
				N 288°
				N 275°
				N 273°
6	Piedra Hueca Formation	335 m	St	N 043°
				N 036°
				N 007°
				N 030°
				N 034°
				N 042°
				N 043°
				N 055°
				N 062°
				N 062°
				N 066°
				N 070°
				N 073°
				N 089°
				N 091°
				N 112°
				N 132°
7	Piedra Hueca Formation	391-392.5 m	St	N 030°
				N 005°
				N 001°
				N 347°
				N 338°
				N 303°
				N 290°
				N 284°
				N 280°
				N 268°
				N 267°
8	Piedra Hueca Formation	428-430 m	St	N 055°
				N 037°
				N 030°
				N 028°
				N 006°
				N 349°
				N 303°
				N 302°
				N 298°
				N 270°
				N 267°
